# Supplementary material for: Distinct cortical codes and temporal dynamics for conscious and unconscious percepts
Source: eLife journal article supplement (doi:10.7554/elife.05652), 2015-05-21
Supplement: supp [file elife_poa_e05652_Figure_5_figure_supplement_1.docx]

**Figure 5 Supplement** **1**

ANOVA on Classification Endurance (CE). The table gives the statistics and significance values for the main effects of Visibility (Seen Correct vs. Unseen Correct), Direction of generalization (forward, backward) and Timeframe (5 levels), as well as their interactions.

|  | **Visibility** | **Direction** | **Timeframe** | **Visibility X Direction** | **Visibility X Timeframe** | **Direction X Timeframe** | **Visibility X Direction X Timefrrame** |
| --- | --- | --- | --- | --- | --- | --- | --- |
| **F** | 12.89 | 14.89 | 4.6 | 12.07 | 3.23 | 20.17 | 2.6 |
| **p** | < .005 | < .003 | < .004 | < .006 | < 0.03 | <.001 | < .05 |
| **df** | (1,11) | (1,11) | (4,44) | (1,11) | (4,44) | (4,44) | (4,44) |
