# Supplementary material for: Distinct cortical codes and temporal dynamics for conscious and unconscious percepts
Source: eLife journal article supplement (doi:10.7554/elife.05652), 2015-05-21
Supplement: supp [file elife_poa_e05652_Figure_5_figure_supplement_2.docx]

**Figure 5 Supplement 2**

ANOVAs on Classification Endurance with factors of of Visibility (Seen Correct vs. Unseen Correct) and Timeframe (5 levels), separately for forward and backward generalization.

a. Forward generalization b. Backward generalization

|  | **Visibility** | **Timeframe** | **Visibility X Timeframe** |
| --- | --- | --- | --- |
| **F** | 5.79 | 23.37 | 2.35 |
| **p** | < 0.04 | < .001 | < 0.07 N.S |
| **df** | (1,11) | (4,44) | (4,44) |

|  | **Visibility** | **Timeframe** | **Visibility X Timeframe** |
| --- | --- | --- | --- |
| **F** | 14.07 | 2.64 | 3.25 |
| **p** | < 0.005 | < .05 | < 0.03 |
| **df** | (1,11) | (4,44) | (4,44) |
