# Supplementary material for: Distinct cortical codes and temporal dynamics for conscious and unconscious percepts
Source: eLife journal article supplement (doi:10.7554/elife.05652), 2015-05-21
Supplement: supp [file elife_poa_e05652_Figure_5_figure_supplement_3.docx]

**Figure 5 Supplement 3**

Significance Values of the Effect of Timeframe (5 levels) for forward and backward generalization in Seen and unseen trials.

|  | **Seen**  **Generalization forward** | **Seen**  **Generalization backward** | **Unseen**  **Generalization forward** | **Unseen**  **Generalization backward** |
| --- | --- | --- | --- | --- |
| **F** | <1 | 21.15 | 4.53 | 13.77 |
| **p** | NS | < .001 | < .004 | < .001 |
| **df** | (4,44) | (4,44) | (4,44) | (4,44) |
