# Supplementary figures and images for: Distinct cortical codes and temporal dynamics for conscious and unconscious percepts
Source: eLife journal article supplement (doi:10.7554/elife.05652), 2015-05-21

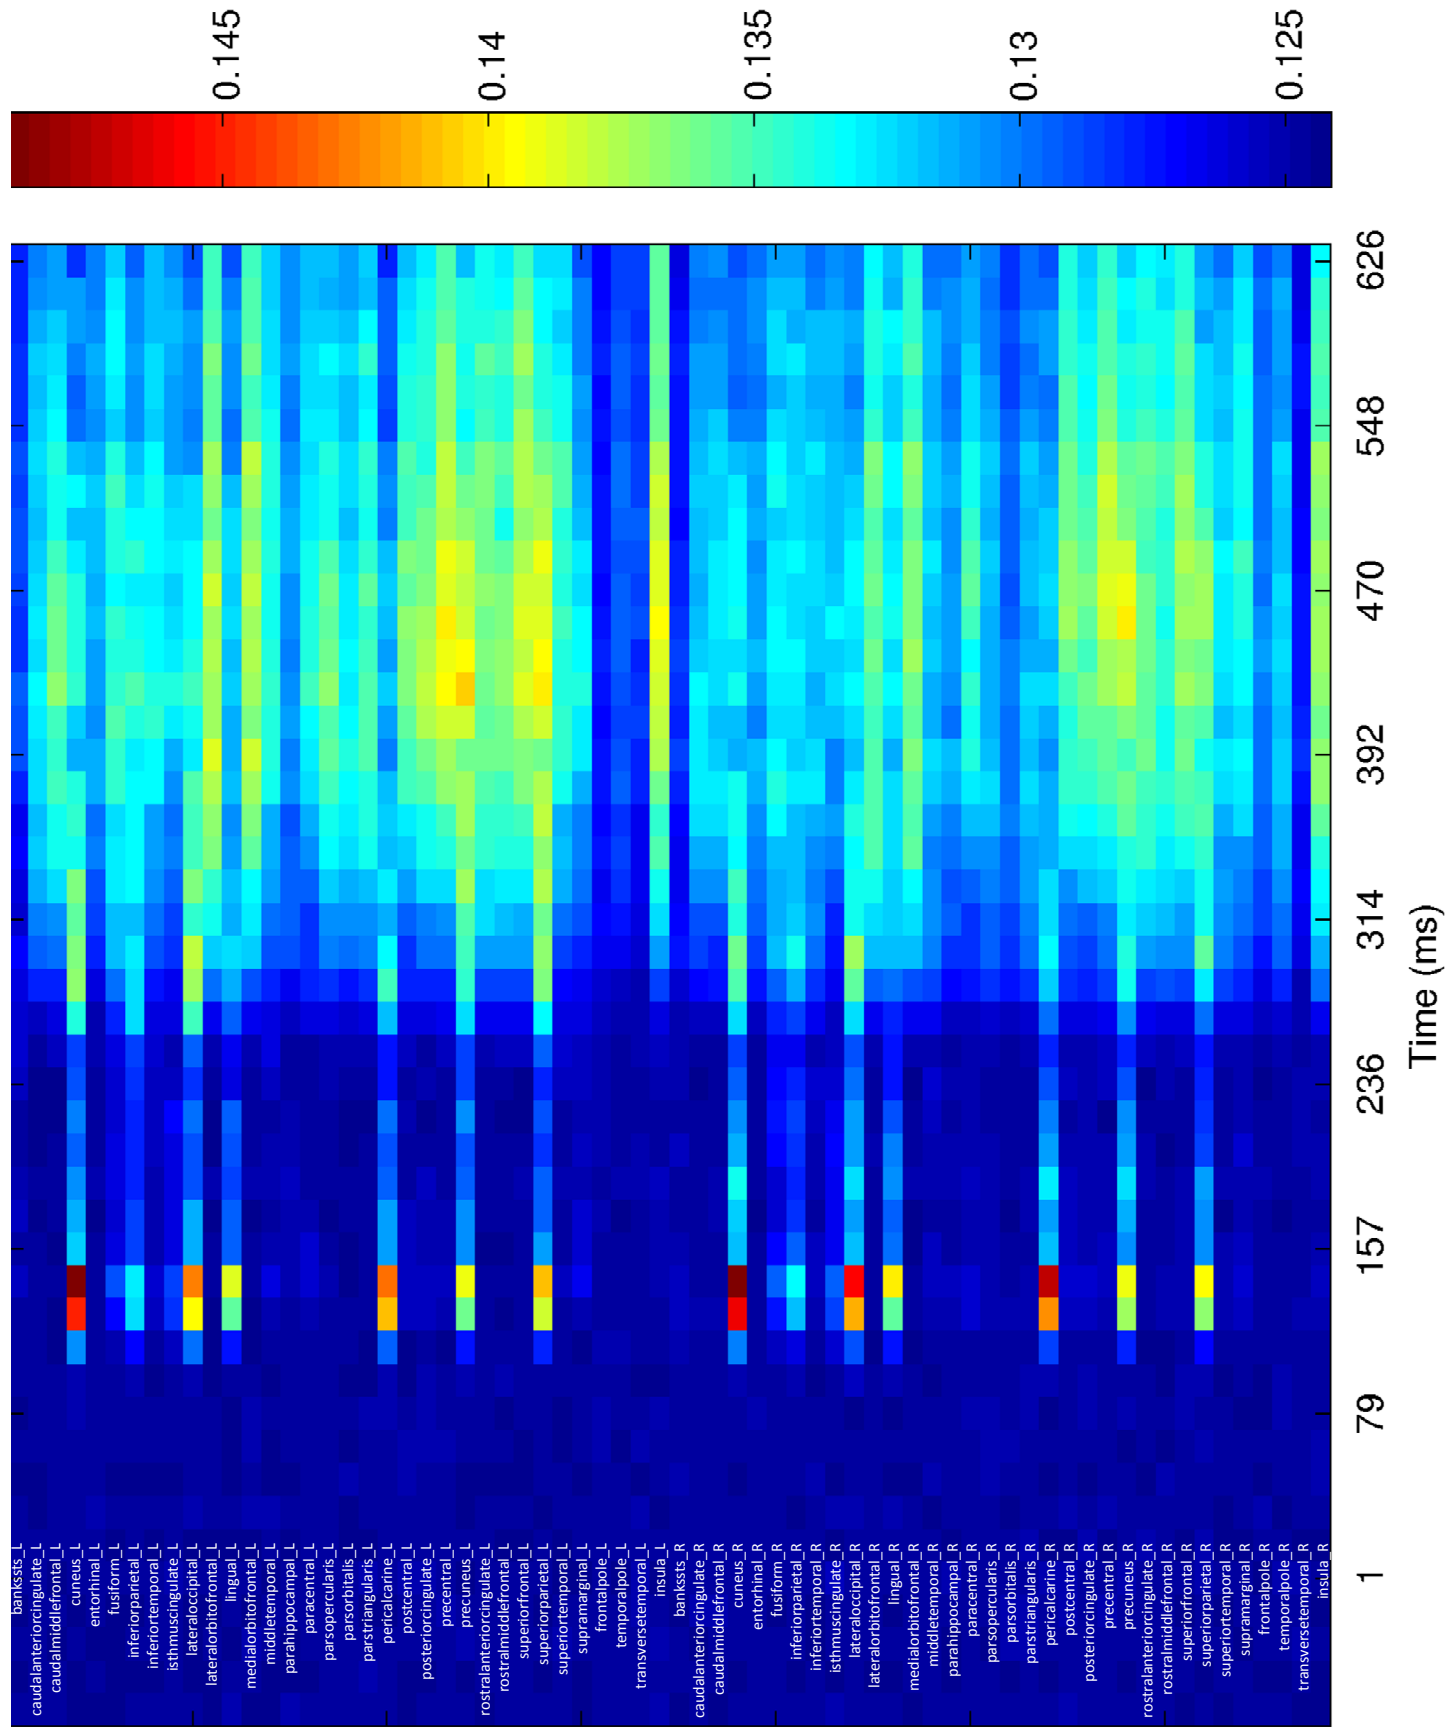

Supplement: supp [file elife_poa_e05652_Figure_4_figure_supplement_1.pdf › elife_poa_e05652_Figure_4_figure_supplement_1.pdf]
